# Supplementary material for: Cobalt carbonate hydroxides anchored on nanoscale pyrenely-graphdiyne nanowalls toward bifunctional electrocatalysts with high performance and stability for overall water splitting
Source: Royal Society of Chemistry journal article supplement (doi:10.1039/d3nj01809a), 2023-01-01
Supplement: d3nj01809a1.pdf [file d3nj01809a1.pdf]

# Supporting Information

## **Cobalt Carbonate Hydroxides Anchored on Nanoscale Pyrenely-Graphdiyne Nanowalls toward Bifunctional Electrocatalyst with Highly Performance and Stable for Overall Water Splitting**

Xiaomei Xu,<sup>a</sup> Wenhui Shang,<sup>a</sup> Yongchun Wang,<sup>a</sup> Fei Wang,<sup>a</sup> Qiang Zhang,<sup>a</sup> Kai Li,<sup>b</sup>  
Mei Wu<sup>c</sup> and Zhiyu Jia<sup>\*,a</sup>

<sup>a</sup> MOE Key Laboratory of Cluster Science, Key Laboratory of Photoelectronic /Electrophotonic Conversion Materials, School of Chemistry and Chemical Engineering, Beijing Institute of Technology, Beijing 100081, P. R. China. E-mail: [jzy@bit.edu.cn](mailto:jzy@bit.edu.cn).

<sup>b</sup> State Key Laboratory of Rare Earth Resource Utilization, Changchun Institute of Applied Chemistry, Chinese Academy of Sciences, Changchun 130022, P. R. China.

<sup>c</sup> School of Engineering, China University of Petroleum-Beijing at Karamay, Karamay, Xinjiang, 834000, P. R. China.

## 1. Materials and Methods.

**Reagents and chemicals** are used as received without further purification. Dichloromethane and diethyl ether were used as received. Tetrahydrofuran was dried by passing through a column of activated molecular sieves using a solvent purification system. All water used was purified with a Millipore system (typically 18.2 M $\Omega$  cm resistivity).

**Reaction conditions** was conducted under inert atmosphere by nitrogen when using a standard Schlenk line technique. All other reactions were performed employing standard organic synthesis protocols.

**Thin layer chromatography (TLC)** was performed using Merck aluminium-backed plates of TLC Silica gel 60 F<sub>254</sub>; the plates were revealed using UV light.

**Column chromatography** was accomplished using silica gel (60 Å pore size, 230-400  $\mu$ m mesh size).

**Nuclear Magnetic Resonance (NMR)** Spectrum were recorded using Bruker Avance 400 spectrometers (Analysis & Testing Center, Beijing Institute of Technology).

## 2. Material Characterization

**Scanning electron microscopy (SEM)** images and **energy dispersive X-ray spectroscopy (EDS)** data were obtained through Zeiss Supra 55 SAPPHIRE SEM equipment with an EDS detector.

**Transmission electron microscopy (TEM)** and **high-resolution transmission electron microscopy (HRTEM)** images and corresponding **element mapping** were acquired by JEOL JEM-2100F transmission electron microscope

**Powder X-ray diffraction (PXRD)** data were detected on a Rigaku XRD-6000 diffractometer under the following conditions: 40 kV, 40 mA, Cu K $\alpha$  radiation ( $\lambda = 0.154$  nm).

**Raman spectroscopy** is recorded on a Renishaw Raman spectrometer at a laser excitation wavelength of 532 nm.

**X-ray photoelectron spectroscopy (XPS)** plots are obtained by monochromatized Al K $\alpha$  exciting X-radiation (PHI Quantera SXM).

**Electrochemical techniques** are carried out on a CH instruments CHI 760E electrochemical workstation with a standard three-electrode cell, where CCH@Pyr-GDY-NWs as the working electrode, graphite rod as the counter electrode and saturated calomel electrode (SCE) as the reference electrode.

## 2. DFT calculation

The Calculation of Hydrogen Electrode model (CHE) based on free energy change ( $\Delta G$ ) for OER is estimated to estimate the reaction activity, which can be calculated by the following expression:<sup>[1]</sup>

$$\Delta G = \Delta E + \Delta ZPE - T\Delta S + \Delta G_U + \Delta G_{pH} + \Delta G_{field} \quad (1)$$

where  $\Delta E$  is the total energy change from initial states to final states of the reaction obtained by DFT calculations.  $\Delta ZPE$  is the change in zero-point energy.  $T$  is room temperature (298.15 K).  $\Delta S$  is the change in entropy.  $\Delta G = -eU$ , where  $U$  is the electrode potential with respect to standard hydrogen electrode, and  $e$  is the transferred charge.  $\Delta G_{pH} = k_B T \ln 10 \times pH$  where  $k_B$  is the Boltzmann constant, and  $pH = 0$  for acid medium.<sup>[2,3]</sup>  $\Delta G_{field}$  is the free energy correction due to the electrochemical double layer and is neglected as in previous studies.<sup>[1,3]</sup> Gas-phase  $H_2O$  at 0.035 bar was used as the reference state, which is the equilibrium point of the gas-phase and liquid water at 298.15 K. The free energy of  $O_2$  is obtained from the free energy change of the reaction  $O_2 + 2H_2 \rightarrow 2H_2O$ , which is -4.92 eV at 298.15 K and a pressure of 0.035 bar [1]. The free energy of  $(H^+ + e^-)$  in solution at standard conditions of  $pH=0$  and  $U=0$  is equal to that of  $1/2H_2$  according to a computational hydrogen electrode model suggested by Nørskov et al.<sup>[1]</sup> The entropy of the  $H_2$  is taken from the National Institute of Standards and Technology (NIST) database,<sup>[4]</sup> while the entropies of the OER intermediates were calculated from the vibrational frequencies.

The working potential is the potential that keeps all the elementary reactions to be exothermic. It is defined as:

$$U_{OER} = \max[-\Delta G_x] / ne \quad (2)$$

where  $n$  is the number of electrons transferred for each reaction, and  $e$  is the elementary charge.<sup>[5,6]</sup>

### 3. Synthetic procedures

#### 3.1 Synthesis of 1,3,6,8-Tetrakis(trimethylsilylethynyl)pyrene

1,3,6,8-Tetrabromopyrene (1.0 g, 1.93 mmol),  $[\text{PdCl}_2(\text{PPh}_3)_2]$  (67 mg, 0.096 mmol), CuI (18 mg, 0.096 mmol),  $\text{PPh}_3$  (50 mg, 0.193 mmol), and trimethylsilylacetylene (1.14g, 11.6 mmol) were added to a degassed solution of diisopropylamine (20 mL) and THF (20 mL) under  $\text{N}_2$ . The resulting mixture was stirred at  $60^\circ\text{C}$  for 12h. The reaction mixture was then cooled to room temperature and solvent was removed to give the crude reaction mixture. Column chromatographic purification of the crude product on silica gel with hexane as the eluent yielded 1,3,6,8-Tetrakis(trimethylsilylethynyl)pyrene (0.33 g, 29 %) as a red orange solid.

$^1\text{H}$  NMR ( $\text{CDCl}_3$ , 400 M Hz):  $\delta = 8.60$  (s, 4 H), 8.31 (s, 2 H), 0.39 (s, 36 H) ppm.

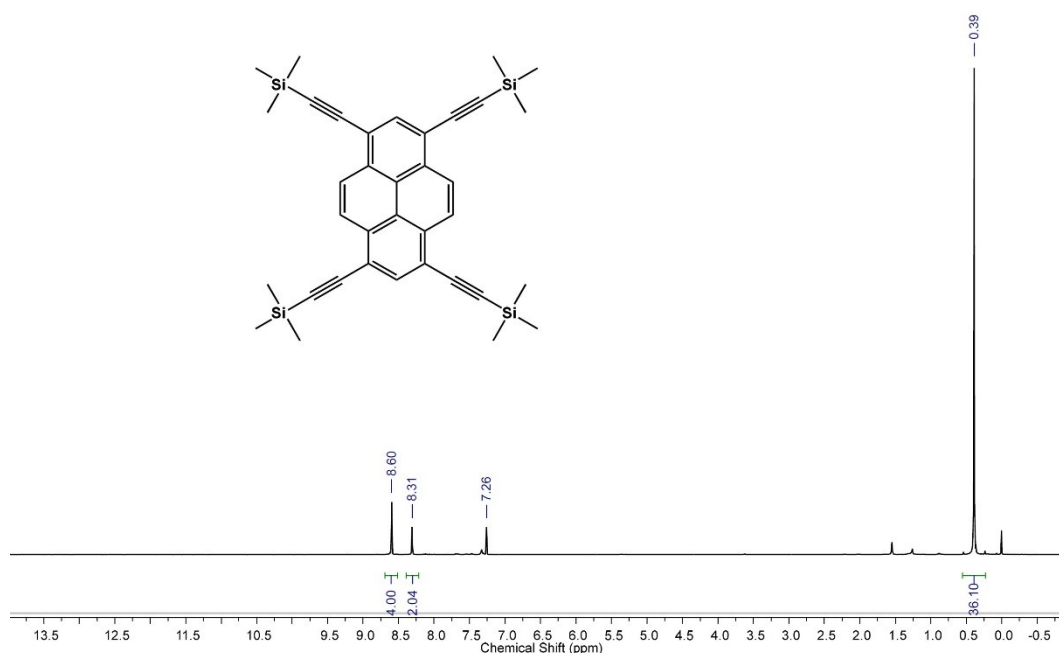

**Fig. S1.**  $^1\text{H}$  NMR spectrum of 1,3,6,8-Tetrakis(trimethylsilylethynyl)pyrene

#### 3.2 Synthesis of 1,3,6,8-Tetraethynylpyrene

A red orange solution of 1,3,6,8-Tetrakis(trimethylsilylethynyl)-pyrene (0.5 g, 0.85 mmol) in degassed THF (30 mL) was treated with *n*-Bu<sub>4</sub>NF (26 mg, 0.085 mmol) and the resulting mixture was stirred at 30 °C for 1 h. The reaction mixture was then poured into ice cold water (100 mL) and the solid obtained was filtered, washed with water (2 × 100 mL), and dried to yield 3g (0.24 g, 93 %) as a pale-yellow solid.

### 3.2 Synthesis of Pyrenyl-Graphdiyne nanowalls (Pyr-GDY-NWs) on carbon cloth

Several (2) pieces of carbon cloth (2 × 2 cm<sup>2</sup>) with H-Cu MPs were charged in a three-neck flask (250 mL), and then a mixed solution of acetone (50 mL), pyridine (2.5 mL), and tetramethylethylenediamine (TMEDA) (0.5 mL) was added to above flask. TEP (40 mg) was dissolved in 150 mL of acetone and the solution was added dropwise into the reaction mixture mentioned above. Then the mixture was heated at 50 °C under Ar atmosphere for 12 hours. The reaction flask was covered with Al foil and protected from light. Finally, two pieces of carbon cloth were washed with acetone and THF to remove unreacted TEP followed by drying under nitrogen. Pyr-GDY-NWs grown on the carbon cloth were further used to prepare CCH@Pyr-GDY-NWs.

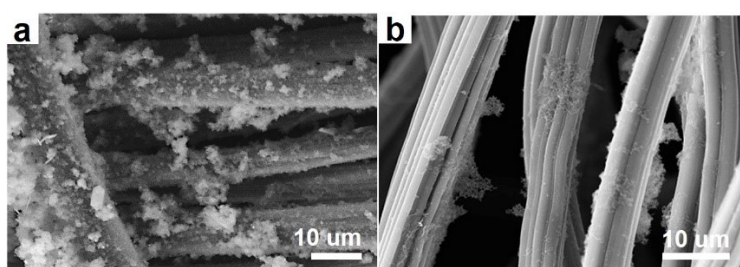

**Fig. S2.** SEM image of CCH@Pyr-GDY-NWs which was catalyzed by Cu film (a) and CuI (b).

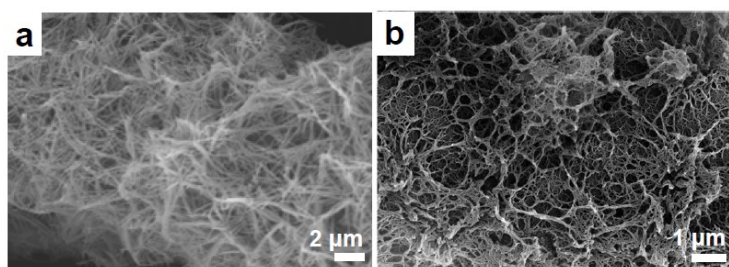

**Fig. S3.** SEM image of CCH@Pyr-GDY-NWs-25 (a) and CCH@Pyr-GDY-NWs-0.5 (b).

#### 4. Supplementary of XPS spectrum

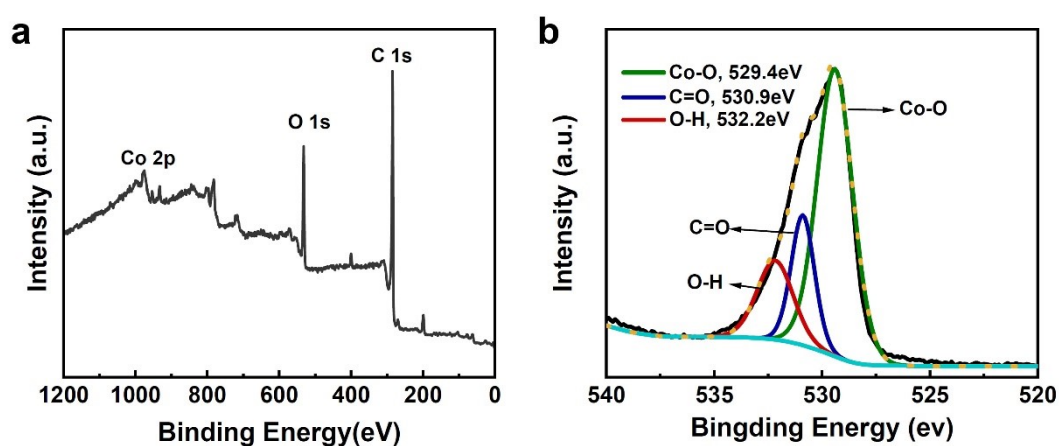

**Fig. S4.** (a) XPS survey scan of CCH@Pyr-GDY-NWs; (b) High-resolution XPS spectrums of CCH@Pyr-GDY-NWs showing O 1s.

The XPS survey scan as shown in Fig. S1 exhibits the presence of Co, C and O suggesting the formation of CCH and Pyr-GDY-NWs. Meanwhile, the peaks at 529.4 eV, 530.9 eV and 532.2 eV could be ascribed to the C-O, C=O and O-H, which means that the material is composed of CCH and Pyr-GDY-NWs.



## 5. EIS and relating data

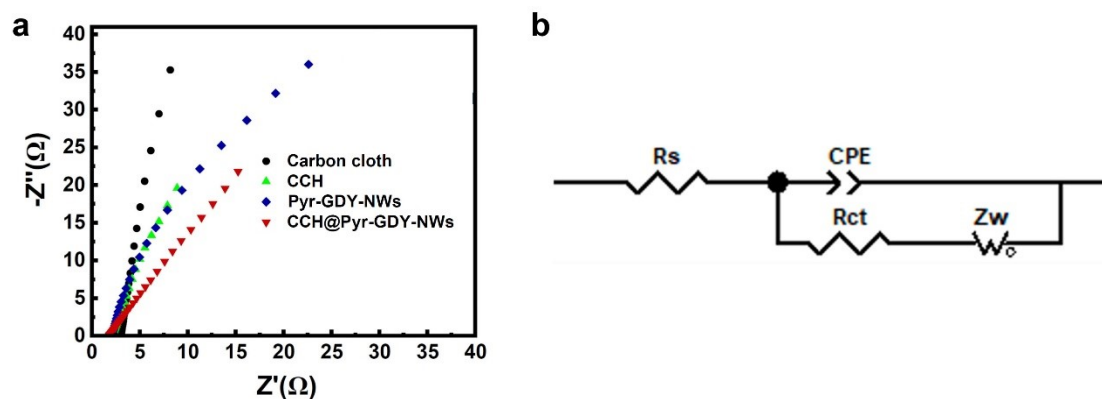

**Fig. S5.** (a) Nyquist plots of the CCH@Pyr-GDY-NWs, CCH, Pyr-GDY-NWs and Carbon cloth in different scale; (b) the equivalent circuit model used for fitting.

**Table S1.**  $R_s$  and  $R_{ct}$  value of CCH@Pyr-GDY-NWs, CCH, Pyr-GDY-NWs and Carbon cloth.

|                 | $R_s$ ( $\Omega$ ) | $R_{ct}$ ( $\Omega$ ) |
|-----------------|--------------------|-----------------------|
| CCH@Pyr-GDY-NWs | 1.68               | 0.70                  |
| CCH             | 1.89               | 6.66                  |
| Pyr-GDY-NWs     | 2.45               | 16.06                 |
| Carbon cloth    | 2.64               | 73.08                 |

## 6. Cyclic voltammetry (CV) curve for different electrodes

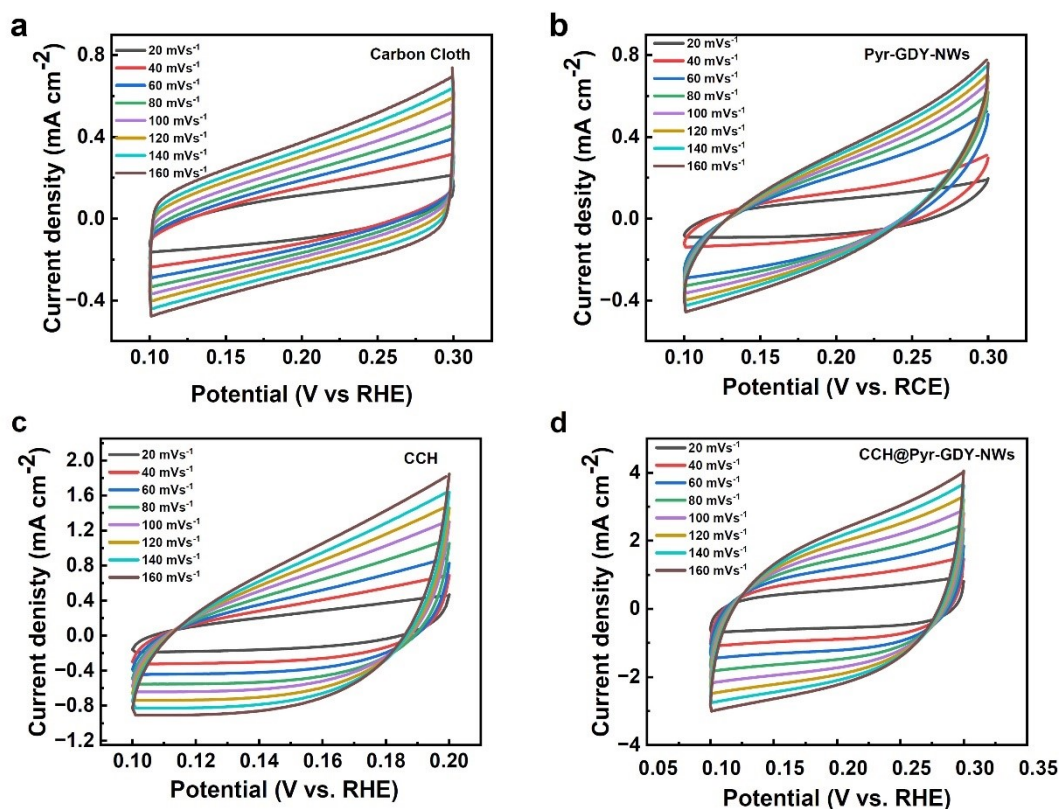

**Fig. S6.** CV curves of (a) Carbon Cloth, (b) Pyr-GDY-NWs, (c) CCH and (d) CCH@Pyr-GDY-NWs at various scan rates (20-160 mV s<sup>-1</sup>).

The ECSA of the catalyst was estimated from the electrochemical double-layer capacitance ( $C_{dl}$ ).  $C_{dl}$  was measured via CV curve with a potential range where no apparent Faradaic process was taking place. The double-layer charging current  $I_C$  can be related to the scan rates through Equation S1:

$$I_C = C_{dl} \times v \quad (\text{Equation S1})$$

Thus, plotting the charging currents at a specific potential against various scan rates leads to a straight line with the slope equal to  $C_{dl}$ . Subsequently, the ECSA value can be obtained by Equation S2:

$$\text{ECSA} = C_{dl} / C_s \quad (\text{Equation S2})$$

where  $C_S$  is specific capacitance measured from ideally smooth, planar surfaces of the catalyst, the  $C_S$  value is  $0.04 \text{ mF cm}^{-2}$  in 1 M KOH based on the typical reported values.<sup>[7]</sup>

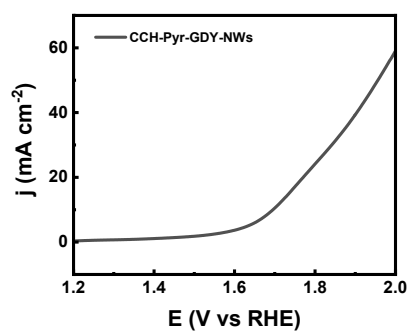

**Fig. S7.** LSV polarization curve of CCH@Pyr-GDY-NWs for the overall water-splitting.

## 7. Stability test for CCH@Pyr-GDY-NWs electrodes

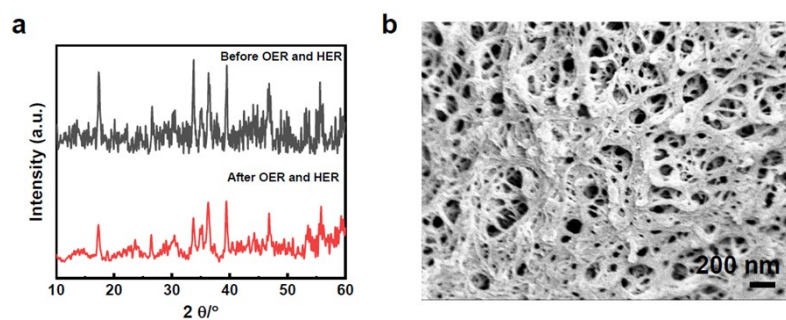

**Fig. S8.** (a) Powder XRD and (b) SEM image of CCH@Pyr-GDY-NWs before and after 40 h of HER and OER.

**Table S2.** Literature survey on potential and Tafel slope of the Co-based nanostructures for OER.

| Electrocatalysts    | Electrolyt<br>e | $j$<br>[mA<br>cm <sup>-2</sup> ] | Overpotential<br>(V vs RHE)<br>[mV] | Tafel<br>slop<br>[mV<br>dec <sup>-1</sup> ] | References       |
|---------------------|-----------------|----------------------------------|-------------------------------------|---------------------------------------------|------------------|
| CCH@Pyr-<br>GDY-NWs | 1.0 M<br>KOH    | 20                               | 330                                 | 66.1                                        | <i>this work</i> |
| Cu@GDY/Co           | 1.0 M<br>NaOH   | 10                               | 350                                 | 148                                         | 8                |
| Co/CoP-5            | 1.0 M<br>KOH    | 10                               | 330                                 | 80                                          | 9                |
| VN-Co-P             | 1.0 M<br>KOH    | 10                               | 320                                 | ~                                           | 10               |
| Co-P/Co-N-<br>C/NPC | 1.0 M<br>KOH    | 10                               | 374                                 | 82                                          | 11               |
| Co <sub>1-x</sub> S | 1.0 M<br>KOH    | 10                               | 311                                 | 55                                          | 12               |
| 2D Co-MOF           | 1.0 M<br>KOH    | 10                               | 263                                 | 74                                          | 13               |
| Co-Ni-P-2           | 1.0 M<br>KOH    | 10                               | 350                                 | 67                                          | 14               |

**Table S3.** Literature survey on potential and Tafel slope of the Co-based nanostructures for HER.

| <b>Electrocatalysts</b>                | <b>Electrolyt<br/>e</b> | <b><i>j</i><br/>[mA<br/>cm<sup>-2</sup>]</b> | <b>Overpotential<br/>(V vs RHE)<br/>[mV]</b> | <b>Tafel<br/>slop<br/>[mV<br/>dec<sup>-1</sup>]</b> | <b>References</b> |
|----------------------------------------|-------------------------|----------------------------------------------|----------------------------------------------|-----------------------------------------------------|-------------------|
| CCH@Pyr-GDY-<br>NWs                    | 1.0 M<br>KOH            | 20                                           | 340                                          | 99                                                  | <i>this work</i>  |
| Co-N-GDY                               | 1.0 M<br>KOH            | 10                                           | 315                                          | 132                                                 | 15                |
| Co/CoP-5                               | 1.0 M<br>KOH            | 10                                           | 310                                          | 95                                                  | 9                 |
| Co-Ni-P-2                              | 1.0 M<br>KOH            | 10                                           | <200                                         | 33                                                  | 16                |
| NiCo <sub>2</sub> S <sub>4</sub> NW/NF | 1.0 M<br>KOH            | 10                                           | 280                                          | 59                                                  | 17                |
| Co/N-CNT                               | 1.0 M<br>KOH            | 10                                           | 350                                          | 141                                                 | 18                |
| CoCoOx@CN                              | 1.0 M<br>KOH            | 10                                           | 280                                          | 115                                                 | 19                |
| Co/CoO@NC@CC                           | 1.0 M<br>KOH            | 10                                           | 220                                          | 80                                                  | 10                |

## References

- [1] J. K. Nørskov, J. Rossmeisl, A. Logadottir, L. Lindqvist, J. R. Kitchin, T. Bligaard, H. Jónsson, Origin of the overpotential for oxygen reduction at a fuel-cell cathode, *J. Phys. Chem. B*, 2004, **108**, 17886.
- [2] L. Yu, X. Pan, X. Cao, P. Hu, X. Bao, Oxygen reduction reaction mechanism on nitrogen-doped graphene: A density functional theory study, *J. Catal.*, 2011, **282**, 183.
- [3] S. Kattel, P. Atanassov, B. Kiefer, Density functional theory study of Ni-Nx/C electrocatalyst for oxygen reduction in alkaline and acidic media, *J. Phys. Chem. C*, 2012, **116**, 17378.
- [4] J. D. Cox, D. D. Wagman, V. A. Medvedev, CODATA key values for thermodynamics, Hemisphere Publishing Corp., New York, 1984, 1.
- [5] G. L. Chai, K. P. Qiu, M. Qiao, M. M. Titirici, C. X. Shang, Z. X. Guo, Active sites engineering leads to exceptional ORR and OER bifunctionality in P, N Co-doped graphene frameworks, *Energy Environ. Sci.*, 2017, **10**, 1186.
- [6] G. L. Chai, Z. F. Hou, D. J. Shu, T. Ikeda, K. Terakura, Active sites and mechanisms for oxygen reduction reaction on nitrogen-doped carbon alloy catalysts: Stone-wales defect and curvature effect, *J. Am. Chem. Soc.*, 2014, **136**, 13629.
- [7] W. Luo, J. Hu, H. Diao, B. Schewarz, C. Streb, Y. F. Song, Robust Polyoxometalate/Nickel Foam Composite Electrodes for Sustained Electrochemical Oxygen Evolution at High pH, *Angew. Chem. Int. Ed.*, 2017, **56**, 4941.
- [8] J. Li, X. Gao, X. Jiang, X.-B. Li, Z. Liu, J. Zhang, C.-H. Tung, L.-Z. Wu, Graphdiyne: A Promising Catalyst-Support To Stabilize Cobalt Nanoparticles for Oxygen Evolution, *ACS Catal.*, 2017, **7**, 5209.

- [9] Z.-H. Xue, H. Su, Q.-Y. Yu, B. Zhang, H.-H. Wang, X.-H. Li, J.-S. Chen, Janus Co/CoP Nanoparticles as Efficient Mott-Schottky Electrocatalysts for Overall Water Splitting in Wide pH Range, *Adv. Energy Mater.*, 2017, **7**, 1602355.
- [10] H. Yang, Y. Hu, D. Huang, T. Xiong, M. Li, M.-S. Balogun, Y. Tong, Efficient hydrogen and oxygen evolution electrocatalysis by cobalt and phosphorus dual-doped vanadium nitride nanowires. *Mater. Today Chem.*, 2019, **11**, 1.
- [11] S. Wang, H. Jang, J. Wang, Z. Wu, X. Liu, J. Cho, Cobalt-Tannin-Framework-Derived Amorphous CoP/CoNC on N, P Co-Doped Porous Carbon with Abundant Active Moieties for Efficient Oxygen Reactions and Water Splitting, *ChemSusChem*, 2019, **12**, 830.
- [12] Y. Zhou, H. C. Zeng, 3D Networks of CoFePi with Hierarchical Porosity for Effective OER Electrocatalysis, *Small*, 2017, **14**, 1704403.
- [13] Y. Xia, L. Bing, S. Zheng, P. Wu, J. Zhan, H. Xue, Q. Xu, H. Pang, Ultrathin two-dimensional cobalt-organic framework nanosheets for high-performance electrocatalytic oxygen evolution, *J. Mater. Chem. A*, 2018, **6**, 22070.
- [14] Y. Pei, Y. Yang, F. Zhang, P. Dong, R. Baines, Y. Ge, H. Chu, P. M. Ajayan, J. Shen, M. Ye, Controlled Electrodeposition Synthesis of Co-Ni-P Film as a Flexible and Inexpensive Electrode for Efficient Overall Water Splitting, *ACS Appl. Mater. Inter.*, 2017, **9**, 31887.
- [15] X. Wang, Z. Yang, W. Si, X. Shen, X. Li, R. Li, Q. Lv, N. Wang, C. Huang, Cobalt-nitrogen-doped graphdiyne as an efficient bifunctional catalyst for oxygen reduction and hydrogen evolution reactions, *Carbon*, 2019, **147**, 9.
- [16] Y. Pei, Y. Yang, F. Zhang, P. Dong, R. Baines, Y. Ge, H. Chu, P. M. Ajayan, J. Shen, M. Ye, Controlled Electrodeposition Synthesis of Co-Ni-P Film as a Flexible



- and Inexpensive Electrode for Efficient Overall Water Splitting, *ACS Appl. Mater. Inter.*, 2017, **9**, 31887.
- [17] A. Sivanantham, P. Ganesan, S. Shanmugam, Hierarchical NiCo<sub>2</sub>S<sub>4</sub> Nanowire Arrays Supported on Ni Foam: An Efficient and Durable Bifunctional Electrocatalyst for Oxygen and Hydrogen Evolution Reactions, *Adv. Funct. Mater.*, 2016, **26**, 4661.
- [18] Z. Liu, X. Yang, G. Hu, L. Feng, Ru Nanoclusters Coupled on Co/N-Doped Carbon Nanotubes Efficiently Catalyzed the Hydrogen Evolution Reaction, *ACS Sustainable Chem. Eng.*, 2020, **8**, 9136.
- [19] C. Liu, W. Ke, Z. Jin, X. Zheng, Q. Liang, Z. Chen, Facile synthesis of Co-Cox /N-doped carbon nanotubes hybrids as efficient and bifunctional catalysts for hydrogen and oxygen evolution, *J. Mater. Sci.-Mater. El.*, 2018, **29**, 1.
